# Supplementary material for: Structural Insight into the Central Element Assembly of the Synaptonemal Complex
Source: PubMed Central journal article supplement — Sci Rep. 2014 Nov 14;4:7059. doi: 10.1038/srep07059 (PMC4231325; doi:10.1038/srep07059), 2014-11-14

## Supplemental Materials

### Structural Insight into the Central Element Assembly of the Synaptonemal Complex

Jing Lu<sup>1,2</sup>, Yanling Gu<sup>1,2</sup>, Jianrong Feng<sup>1,2</sup>, Weihong Zhou<sup>2</sup>, Xue Yang<sup>1</sup>, Yuequan  
Shen<sup>1,2,3,4</sup>

<sup>1</sup>State Key Laboratory of Medicinal Chemical Biology, Nankai University, 94 Weijin  
Road, Tianjin 300071, China

<sup>2</sup>College of Life Sciences, Nankai University, 94 Weijin Road, Tianjin 300071, China

<sup>3</sup>Synergetic Innovation Center of Chemical Science and Engineering, 94 Weijin Road,  
Tianjin 300071, China

<sup>4</sup>To whom correspondence may be addressed.

Yuequan Shen,

E-mail: [yuequan74@yahoo.com](mailto:yuequan74@yahoo.com); [yshen@nankai.edu.cn](mailto:yshen@nankai.edu.cn); Tel: +86-22-23506462

Running title: structure of syce3 protein

Fig 2C

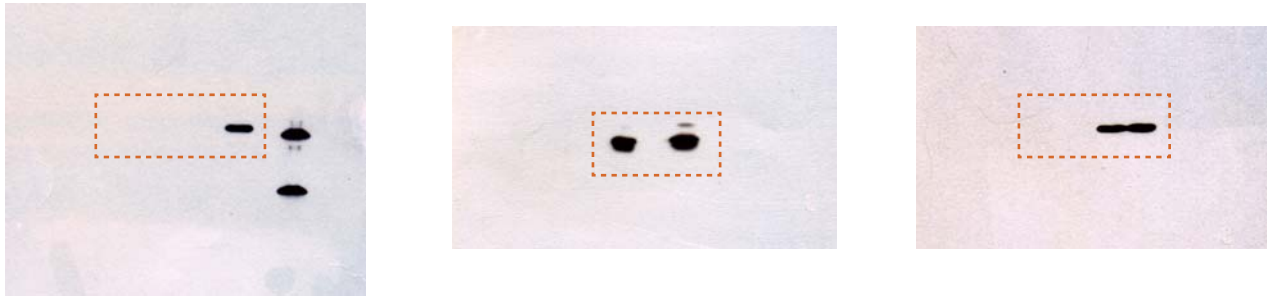

Fig 3A

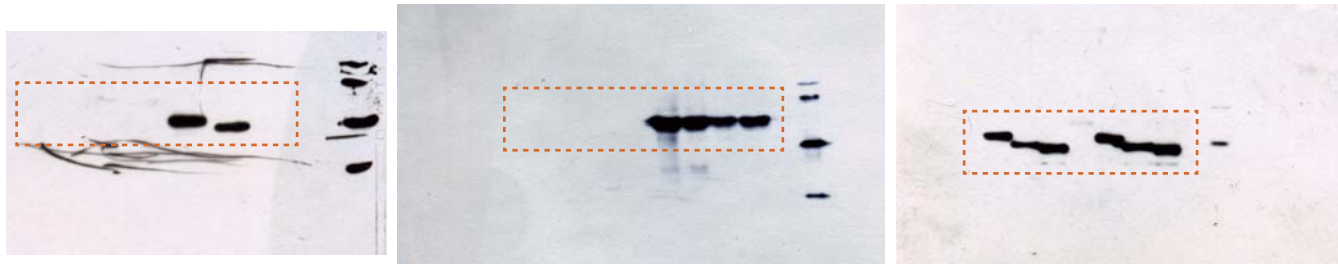

Fig 3B

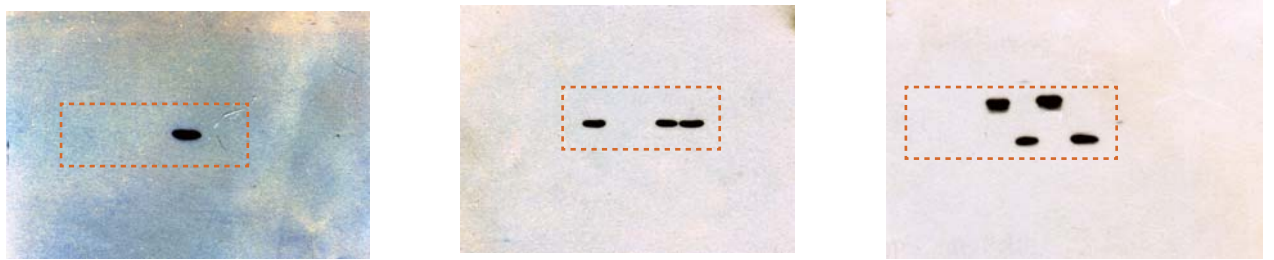

Fig 2D

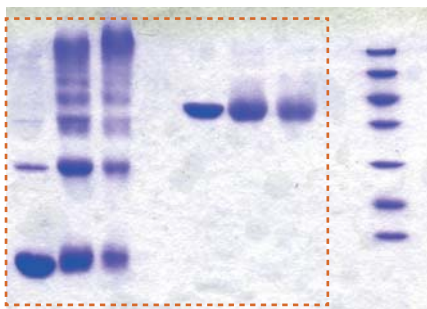

Supplement: srep07059-s1.pdf [file srep07059-s1.pdf]
